# Supplementary material
Source: PubMed Central journal article supplement (PMC4572384)
Supplement: kampman_et_al_eSupplement.pdf [file kampman_et_al_eSupplement.pdf]

## **GUIDELINE DEVELOPMENT**

### **Methods**

A team consisting of clinical nutritionists (HN, IR), a speech and language therapist (MTB), stroke nurses, and physicians (MK, MTK) developed these guidelines, following the Appraisal of Guidelines, Research and Evaluation (AGREE) framework [AGREE collaboration 2003].

PubMed was searched for English language papers published between 1.1.2007 and 1.6.2012 (updated until 30.6.14), using the MeSH terms stroke, humans, dysphagia and nutrition. Titles and abstracts were screened for relevant content to retrieve articles providing the evidence base for the guidelines. Levels of evidence and grades of recommendations were assessed by three of the authors (SHJ, MK, MTK) applying the SIGN methodology, which classifies the strength of recommendations from grade A (highest level of evidence) to D [SIGN 2013].

The International Guideline Library ([www.g-i-n.net](http://www.g-i-n.net)) and National Guideline Clearinghouse Home ([www.guideline.gov](http://www.guideline.gov)) were searched using the terms stroke and dysphagia/nutrition.

### **Results**

The search of the literature retrieved more than 300 publications. Nine guidelines, 1 systematic review, and reports of 12 individual studies were formally evaluated (Tables 1 and 2) and provide the evidence base for the recommendation that patients with acute stroke should be screened for undernutrition and nutritional risk and that a swallow test should be performed before offering food or drink to the patients (Table 3). The guideline, containing an instructional video showing how to perform the swallow test, was published in June 2012 [Kampman and Johnsen 2012].

### **Conclusion**

We graded the recommendation for both nutritional risk screening and for performing a swallow test before offering food or drink as SIGN grade B [SIGN 2013], which is in accordance with most published guidelines (Table 1).

**Table 1. Recommendations in evidence-based guidelines** (published 2007 or later, sorted by descending year of last update)

| Guideline hyperlink (last updated)                                                                                                                                                         | Nutritional risk screening                                                                                                                                                                                            | Grade*  | Swallow screen                                                                                                                                                                                                              | Grade*             |
|--------------------------------------------------------------------------------------------------------------------------------------------------------------------------------------------|-----------------------------------------------------------------------------------------------------------------------------------------------------------------------------------------------------------------------|---------|-----------------------------------------------------------------------------------------------------------------------------------------------------------------------------------------------------------------------------|--------------------|
| <a href="#">Canadian Best Practice Recommendations for Stroke Care 2010</a> (2013)                                                                                                         | The nutritional status should be screened as early as possible, ideally on the day of admission, using validated screening tools.                                                                                     | Grade B | The swallowing status should be screened as early as possible, ideally on the day of admission, using validated screening tools.                                                                                            | Grade B            |
| <a href="#">AHA/ASA: Guidelines for the Early Management of Patients With Acute Ischemic Stroke.</a> (2013)                                                                                | ---                                                                                                                                                                                                                   | ---     | Assessment of swallowing before the patient begins eating, drinking, or receiving oral medications is recommended.                                                                                                          | Grade B            |
| <a href="#">Royal College of Physicians: National Clinical Guideline for Stroke</a> (2012)                                                                                                 | All patients should be assessed within a maximum of 4 hours of admission for their nutritional status by trained staff using a structured assessment such as the Malnutrition Universal Screen Tool (MUST).           | ---     | All patients should be assessed within a maximum of 4 hours of admission for their ability to swallow, using a validated swallow screening test (e.g. 50 ml water swallow) administered by an appropriately trained person. | ---                |
| <a href="#">Norwegian Directorate of Health: Behandling og rehabilitering ved hjerneslag</a> [Norwegian stroke guideline] (2010)                                                           | BMI, serum albumin                                                                                                                                                                                                    | ---     | A swallow test should be performed before oral intake of fluids or food                                                                                                                                                     | ---                |
| <a href="#">SIGN: Management of patients with stroke: identification and management of dysphagia</a> (2010)                                                                                | Assessment of nutritional risk should be carried out within the first 48 hours using a valid and reliable screening procedure suitable for stroke patients.                                                           | Grade D | All stroke patients should be screened for dysphagia before being given food or drink. The water swallow test should be used as a part of the screening for aspiration risk in stroke patients.                             | Grade C<br>Grade B |
| <a href="#">Clinical practice guideline for the management of stroke rehabilitation</a><br><a href="#">Department of Veterans Affairs/</a><br><a href="#">Department of Defense</a> (2010) | Recommend all patients receive evaluation of nutrition and hydration, as soon as possible after admission. Food and fluid intake should be monitored in all patients, and body weight should be determined regularly. | ---     | A bedside swallow screening should be completed before oral intake. All patients should be screened for swallowing deficits by appropriately trained clinicians, using standardized and valid screening tools.              | ---                |
| <a href="#">Clinical Guidelines for Acute Stroke Management. National Stroke Foundation Australia</a> (2010)                                                                               | All patients with stroke should be screened for malnutrition using a validated assessment tool.                                                                                                                       | Grade B | Patients should be screened for swallowing deficits before being given food, drink or oral medications by trained personnel using a validated tool.                                                                         | Grade B            |

|                                                                                                                                   |                                                                                                                                                                                               |           |                                                                                                                                                                                         |                        |
|-----------------------------------------------------------------------------------------------------------------------------------|-----------------------------------------------------------------------------------------------------------------------------------------------------------------------------------------------|-----------|-----------------------------------------------------------------------------------------------------------------------------------------------------------------------------------------|------------------------|
| <a href="#">NICE: Diagnosis and initial management of acute stroke</a> (2008)                                                     | All hospital inpatients on admission should be screened for malnutrition and the risk of malnutrition. The Malnutrition Universal Screening Tool (MUST), for example, may be used to do this. | Consensus | On admission, people with acute stroke should have their swallowing screened by an appropriately trained healthcare professional before being given any oral food, fluid or medication. | Consensus              |
| <a href="#">European Stroke Organisation: Guidelines for Management of Ischaemic Stroke and Transient Ischaemic Attack</a> (2008) | ---                                                                                                                                                                                           | ---       | Swallowing assessment is recommended                                                                                                                                                    | Good clinical practice |

\* Grading of practice recommendations A highest-D lowest [SIGN 2013]

## Evidence base for recommendations in the Norwegian guidelines

**Table 2a. Screening for malnutrition and nutritional risk should be performed in patients with acute stroke**

| Reference                       | Design                                                         | Findings                                                                                                                                                                                                                         | Evidence*                                                                                                                    | Grading*       |
|---------------------------------|----------------------------------------------------------------|----------------------------------------------------------------------------------------------------------------------------------------------------------------------------------------------------------------------------------|------------------------------------------------------------------------------------------------------------------------------|----------------|
| [Martineau <i>et al.</i> 2005]  | Retrospective cohort, n=73 (62% of eligible)                   | Undernutrition (subjective global assessment, SGA) within 48 hours after admission: 19% undernourished, associated with longer length of stay, increased complications – poor design                                             | Malnutrition (SGA) – longer length of stay, increased complications <b>level 2-</b>                                          | <b>Grade B</b> |
| [Gariballa <i>et al.</i> 1998]  | Prospective cohort stroke patients, n=201, mean age 77.9 years | Low S-albumin within 48 hours after admission strong and independent predictor death. 31% BMI <20 at admission.                                                                                                                  | Low serum albumin is a strong and independent predictor of death <b>level 2+</b>                                             |                |
| [Shen <i>et al.</i> 2011]       | Acute Stroke registry, n=483                                   | Malnutrition (BMI, cholesterol, albumin) was independent risk factor for poorer functional outcomes at 6 months (OR 2.6 (1.3-.5) for Barthel Index < 75)                                                                         | Malnutrition predicts functional outcome at 6 months <b>level 2+</b><br>S-albumin predicts death at 3 months <b>level 2+</b> |                |
| [Yoo <i>et al.</i> 2008]        | Prospective cohort, n=131                                      | 5-parameter assessment of nutritional risk: undernutrition 1 week after admission independently predicted poor outcome (modified Rankin Scale) at 3 months                                                                       | Undernutrition 1 week after admission independently predicted poor outcome at 3 months <b>level 2+</b>                       |                |
| FOOD trial Collaboration [2003] | Observational study, 15 countries, n=2955                      | Undernourished (subjective global assessment, n=275/2955) more likely pneumonia, infections, GI bleeding. Undernutrition predicts death (adjusted OR 1.82) and death or modified Rankin scale ≥3 (=dependent) (adjusted OR 1.52) | Undernutrition predicts death and “death or being dependent” at 6 months <b>level 1+</b>                                     |                |

\* SIGN methodology was applied to assess levels of evidence and grades of recommendations (detailed below).

**Table 2b. Patients with acute stroke should be screened for dysphagia before offering food or drink**

| Reference                             | Design                                                                                         | Findings                                                                                                                                                                             | Evidence*                                                                                                                                                        | Grading*       |
|---------------------------------------|------------------------------------------------------------------------------------------------|--------------------------------------------------------------------------------------------------------------------------------------------------------------------------------------|------------------------------------------------------------------------------------------------------------------------------------------------------------------|----------------|
| [Martino <i>et al.</i> 2005]          | Systematic review 1966-2005, mostly small studies, different swallow tests                     | Increased pneumonia risk in patients with dysphagia (RR, 3.17; 95% CI, 2.07, 4.87)                                                                                                   | Swallow test identifies patients at risk of pneumonia <b>level 2++</b>                                                                                           | <b>Grade B</b> |
| [Hinchey <i>et al.</i> 2005]          | Observational study, 15 countries, n=2532, different swallow tests                             | Lower pneumonia risk in patients screened using formal protocol (formal protocol n=742, 2.4% pneumonia; informal protocol n=1790, 5.4% pneumonia; P=0.0016)                          | Lower pneumonia risk in patients screened using formal protocol <b>level 2++</b>                                                                                 |                |
| [Lakshminarayanan <i>et al.</i> 2010] | Acute stroke registry, n=18017                                                                 | Pneumonia rate was doubled in 4509 unscreened patients compared with 8406 patients who were screened and passed (OR 2.2; 95% CI 1.7 to 2.7), 38% screened failed                     | Lower pneumonia risk in patients who passed swallow screen <b>level 2++</b>                                                                                      |                |
| [Sellars <i>et al.</i> 2007]          | Prospective cohort (n=412)                                                                     | Failed water swallow test independent predictor pneumonia                                                                                                                            | Higher pneumonia risk in patients who failed swallow screen <b>level 2+/2++</b>                                                                                  |                |
| [Yeh <i>et al.</i> 2011]              | Prospective cohort; n=74 pre- and 102 post intervention                                        | Stroke-associated pneumonia reduced after introduction swallow screen in ICU (OR 0.42; 95% CI 0.18 to 1.00; p=0.05)                                                                  | Halved pneumonia risk after introduction swallow screen <b>level 2+</b>                                                                                          |                |
| [Ickenstein <i>et al.</i> 2010]       | Observational study, n= app. 700 pre (2007) and app. 700 post (2009) intervention              | 3-step protocol (nurse screening, SLT assessment, endoscopy) reduced pneumonia (7.4% to 2.8%) and in-hospital mortality (8.0% to 4.2%).                                              | Halved pneumonia risk and in-hospital mortality after introduction 3-step swallow assessment <b>level 2+</b>                                                     |                |
| [Middleton <i>et al.</i> 2011]        | Single-blind cluster RCT 19 acute stroke units, n=1696                                         | Proactive management of fever, hyperglycaemia, and swallowing dysfunction resulted in better 90 day outcome: dead or modified Rankin scale $\geq 2$ (=dependent): p=0.002; BI (n.s.) | Multiple interventions including management of swallowing dysfunction resulted in decreased risk of being dead or dependent at 90 days <b>level not assigned</b> |                |
| [Titsworth <i>et al.</i> 2013]        | Single-centre prospective interrupted time series trial, n=1686 pre- and 648 post intervention | Implementation of dysphagia screen without oral challenge coincided with drop in hospital-acquired pneumonia from 6.5 to 2.8%                                                        | Halved pneumonia risk after introduction swallow screen <b>level 2++</b>                                                                                         |                |

\* The SIGN grading system was applied: grade A (highest level of evidence) to D. Good practice points (GPP) are based on the clinical experience of the guideline development group [SIGN 2013].

**Table 3. Summary of the recommendations for screening in the Norwegian guideline [Kampman and Johnsen 2012]**

| Recommendation                                                                                                                                                                                                                                                                                                                   | Grading            |
|----------------------------------------------------------------------------------------------------------------------------------------------------------------------------------------------------------------------------------------------------------------------------------------------------------------------------------|--------------------|
| <b>Screening for undernutrition and nutritional risk in patients with acute stroke</b><br><b>NRS 2002</b> should be performed soon after admission and be repeated regularly because undernutrition may develop or worsen during hospitalisation.                                                                                | Grade B            |
| <b>Screening for dysphagia</b><br>A swallowing screen should be performed before offering food or drink to patients with acute stroke.<br>Nurses should repeat the swallowing screen when deterioration is suspected and to monitor possible improvement in patients who are not followed up by a speech and language therapist. | Grade B<br><br>GPP |

Recommendations are graded applying the SIGN grading system [SIGN 2013] from grade A (highest level of evidence) to D. Good practice points (GPP) are based on the clinical experience of the guideline development group. The evidence base for the recommendations regarding screening for nutritional risk and dysphagia is summarized in Table 2.

## References

AGREE collaboration. Development and validation of an international appraisal instrument for assessing the quality of clinical practice guidelines: the AGREE project. *Qual Saf Health Care* 2003; 12: 18-23.

[AHA/ASA: Guidelines for the Early Management of Patients With Acute Ischemic Stroke.](http://stroke.ahajournals.org/content/early/2013/01/31/STR.0b013e318284056a.full.pdf) (2013)

<http://stroke.ahajournals.org/content/early/2013/01/31/STR.0b013e318284056a.full.pdf> Accessed January 26, 2015.

FOOD Trial Collaboration. Poor nutritional status on admission predicts poor outcomes after stroke: observational data from the FOOD trial. *Stroke* 2003 June;34(6):1450-6.

[Canadian Best Practice Recommendations for Stroke Care 2010](http://strokebestpractices.ca/wp-content/uploads/2013/05/Ch4_SBP2013_Acute-Inpatient-Care_22MAY13_EN_FINAL4.pdf) (2013) [http://strokebestpractices.ca/wp-content/uploads/2013/05/Ch4\\_SBP2013\\_Acute-Inpatient-Care\\_22MAY13\\_EN\\_FINAL4.pdf](http://strokebestpractices.ca/wp-content/uploads/2013/05/Ch4_SBP2013_Acute-Inpatient-Care_22MAY13_EN_FINAL4.pdf). Accessed January 26, 2015.

[Clinical Guidelines for Acute Stroke Management. National Stroke Foundation Australia](http://strokefoundation.com.au/health-professionals/tools-and-resources/clinical-guidelines-for-stroke-prevention-and-management/) (2010) <http://strokefoundation.com.au/health-professionals/tools-and-resources/clinical-guidelines-for-stroke-prevention-and-management/> Accessed January 26, 2015.

[Clinical practice guideline for the management of stroke rehabilitation Department of Veterans Affairs/Department of Defense](#) (2010)

<http://www.healthquality.va.gov/guidelines/Rehab/stroke/> Accessed January 26, 2015.

[European Stroke Organisation: Guidelines for Management of Ischaemic Stroke and Transient Ischaemic Attack](#) (2008) [http://www.congrex-switzerland.com/fileadmin/files/2013/eso-stroke/pdf/ESO08\\_Guidelines\\_Original\\_english.pdf](http://www.congrex-switzerland.com/fileadmin/files/2013/eso-stroke/pdf/ESO08_Guidelines_Original_english.pdf) Accessed January 26, 2015.

Gariballa SE, Parker SG, Taub N, Castleden M. Nutritional status of hospitalized acute stroke patients. *Br J Nutr* 1998; 79: 481-487.

Hinchey JA, Shephard T, Furie K, Smith D, Wang D, Tonn S. Formal dysphagia screening protocols prevent pneumonia. *Stroke* 2005; 36: 1972-1976.

Ickenstein GW, Riecker A, Hohlig C *et al.* Pneumonia and in-hospital mortality in the context of neurogenic oropharyngeal dysphagia (NOD) in stroke and a new NOD step-wise concept. *J Neurol* 2010; 257: 1492-1499.

Kampman MT, Johnsen SH. Hjerneslag – ernæring i akuttfasen [Nutrition in acute stroke]. The Norwegian Electronic Health Library's website.

<http://www.helsebiblioteket.no/microsite/fagprosedyrer/fagprosedyrer/hjerneslag-ern%C3%A6ring-i-akuttfasen>. June 2012. Accessed January 26, 2015.

Lakshminarayan K, Tsai AW, Tong X *et al.* Utility of dysphagia screening results in predicting poststroke pneumonia. *Stroke* 2010; 41: 2849-2854.

Martineau J, Bauer JD, Isenring E, Cohen S. Malnutrition determined by the patient-generated subjective global assessment is associated with poor outcomes in acute stroke patients. *Clin Nutr* 2005; 24: 1073-1077.

Martino R, Foley N, Bhogal S, Diamant N, Speechley M, Teasell R. Dysphagia after stroke: incidence, diagnosis, and pulmonary complications. *Stroke* 2005; 36: 2756-2763.

Middleton S, McElduff P, Ward J *et al.* Implementation of evidence-based treatment protocols to manage fever, hyperglycaemia, and swallowing dysfunction in acute stroke (QASC): a cluster randomised controlled trial. *Lancet* 2011; 378: 1699-1706.

[NICE: Diagnosis and initial management of acute stroke](#) (2008) <http://www.nice.org.uk/guidance/cg68/resources/guidance-stroke-pdf>

[Norwegian Directorate of Health: Behandling og rehabilitering ved hjerneslag](#) [Norwegian stroke guideline] (2010)

<http://helsedirektoratet.no/publikasjoner/nasjonal-retningslinje-for-behandling-og-rehabilitering-ved-hjerneslag-fullversjon/Sider/default.aspx> Accessed January 26, 2015.

[Royal College of Physicians: National Clinical Guideline for Stroke](#) (2012) <https://www.rcplondon.ac.uk/sites/default/files/national-clinical-guidelines-for-stroke-fourth-edition.pdf> Accessed January 26, 2015.

Sellars C, Bowie L, Bagg J *et al*. Risk factors for chest infection in acute stroke: a prospective cohort study. *Stroke* 2007; 38: 2284-2291.

Shen HC, Chen HF, Peng LN *et al*. Impact of nutritional status on long-term functional outcomes of post-acute stroke patients in Taiwan. *Arch Gerontol Geriatr* 2011; 53: e149-e152.

SIGN grading system 1999 – 2012 <http://www.sign.ac.uk/guidelines/fulltext/50/annexoldb.html> Accessed January 26, 2015.

[SIGN: Management of patients with stroke: identification and management of dysphagia](http://www.sign.ac.uk/pdf/sign119.pdf) (2010) <http://www.sign.ac.uk/pdf/sign119.pdf> Accessed January 26, 2015.

Titsworth WL, Abram J, Fullerton A *et al*. Prospective quality initiative to maximize dysphagia screening reduces hospital-acquired pneumonia prevalence in patients with stroke. *Stroke* 2013; 44: 3154-3160.

Yeh SJ, Huang KY, Wang TG *et al*. Dysphagia screening decreases pneumonia in acute stroke patients admitted to the stroke intensive care unit. *J Neurol Sci* 2011; 306: 38-41.

Yoo SH, Kim JS, Kwon SU, Yun SC, Koh JY, Kang DW. Undernutrition as a predictor of poor clinical outcomes in acute ischemic stroke patients. *Arch Neurol* 2008; 65: 39-43.
